# Supplementary material
Source: PubMed Central journal article supplement (PMC3756833)
Supplement: NIHMS224096-supplement-1_si_001.pdf [file NIHMS224096-supplement-1_si_001.pdf]

## Supporting online material for “Size and crystallinity in protein-templated inorganic nanoparticles”

*Craig C. Jolley, Masaki Uchida, Courtney Reichhardt, Richard Harrington, Sebyung Kang, Michael Klem, John B. Parise, Trevor Douglas*

### Pair Distribution Function plots

Some of the PDFs illustrated below are included in Figure 1 of the main text; the coherent domain sizes obtained from them are included in Figure 2. The peaks at 1.5 Å and 2.5 Å arising from covalent bonds within the protein phase are especially prominent in the samples with lower metal loading. Calculated fits were generated using PDFgui<sup>1</sup>.

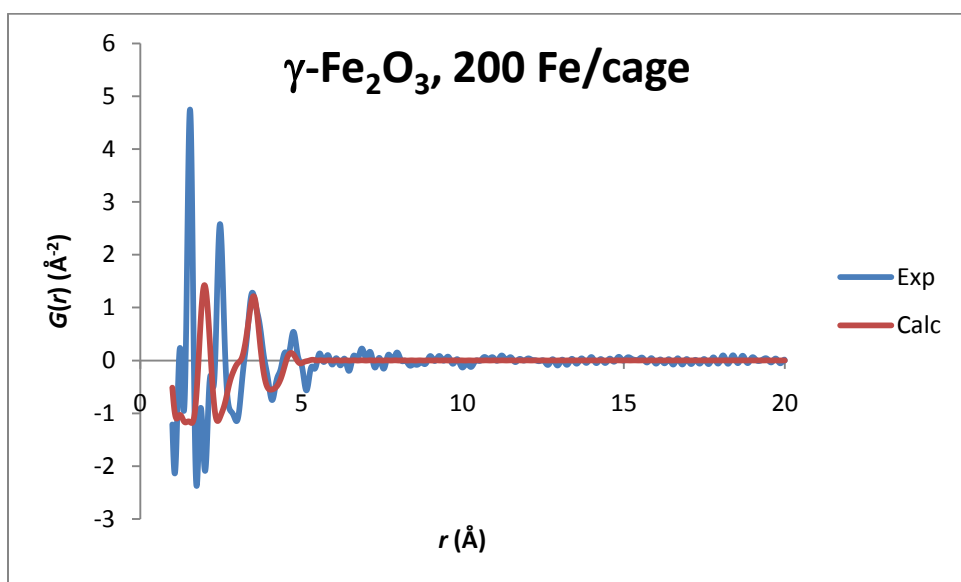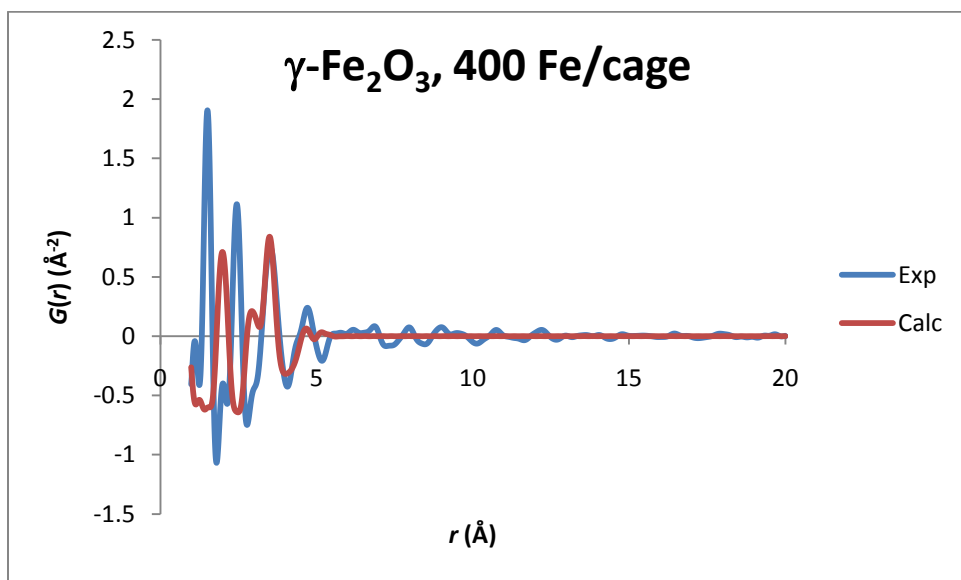

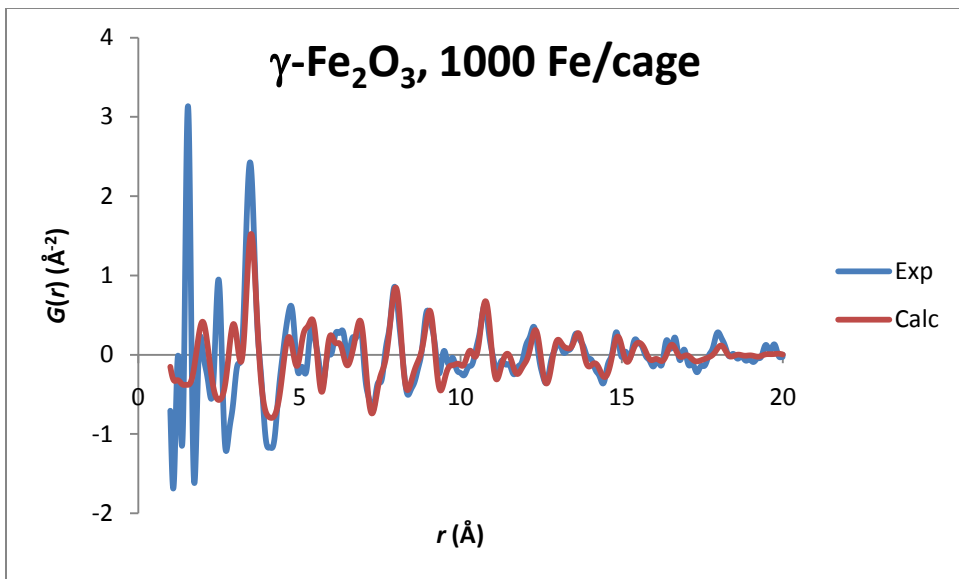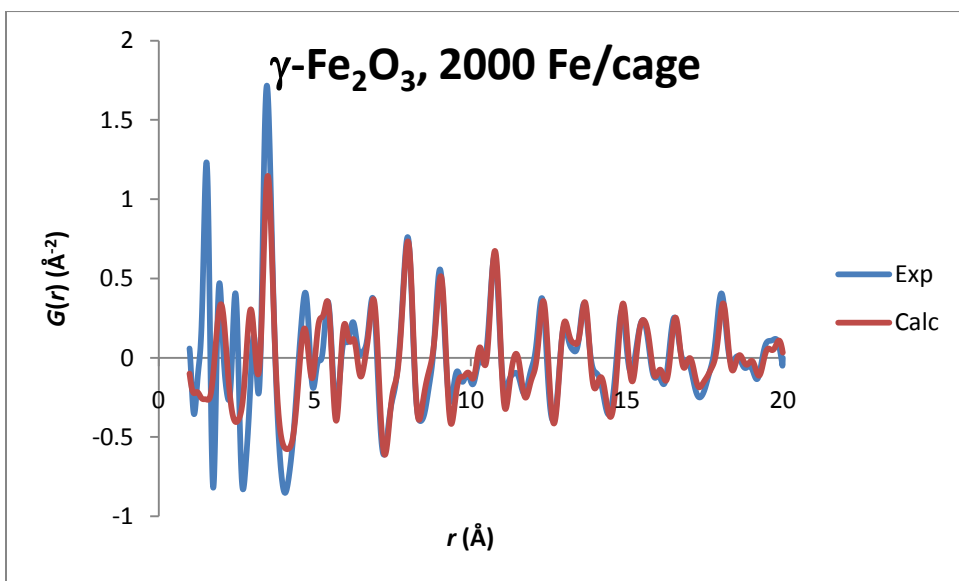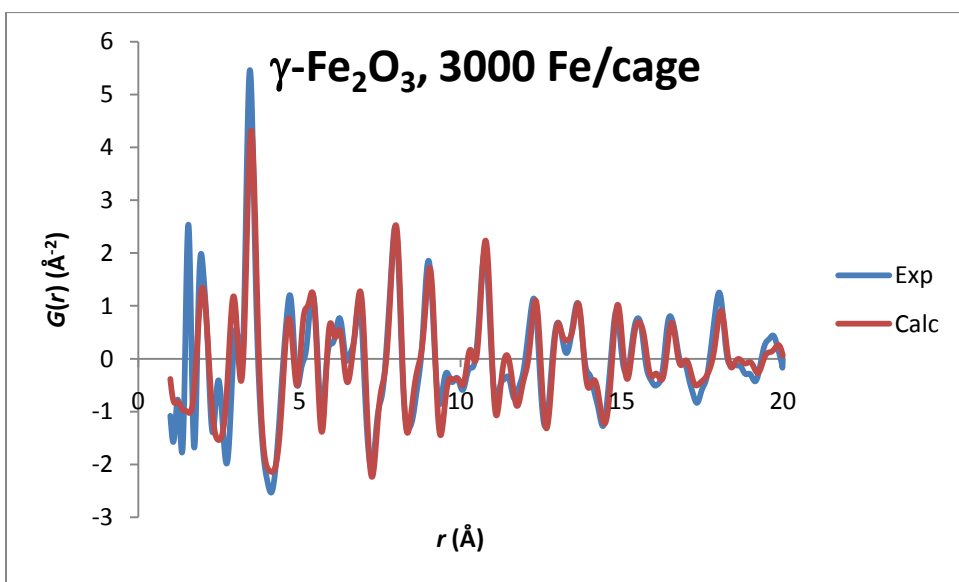

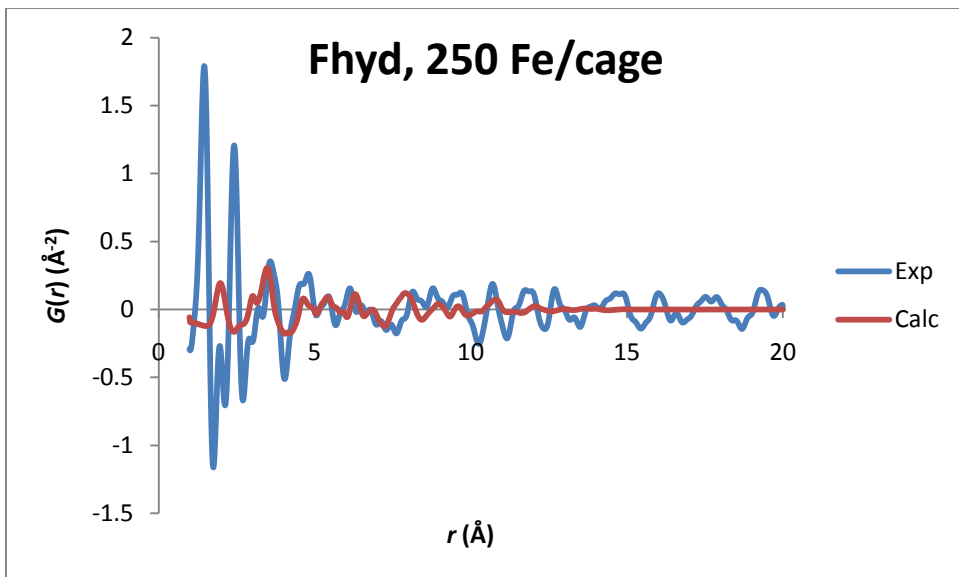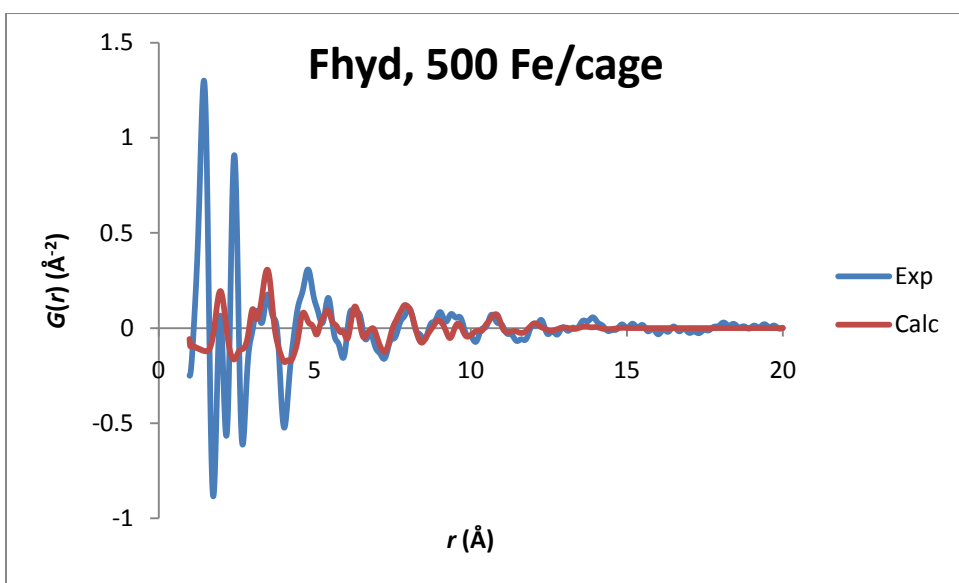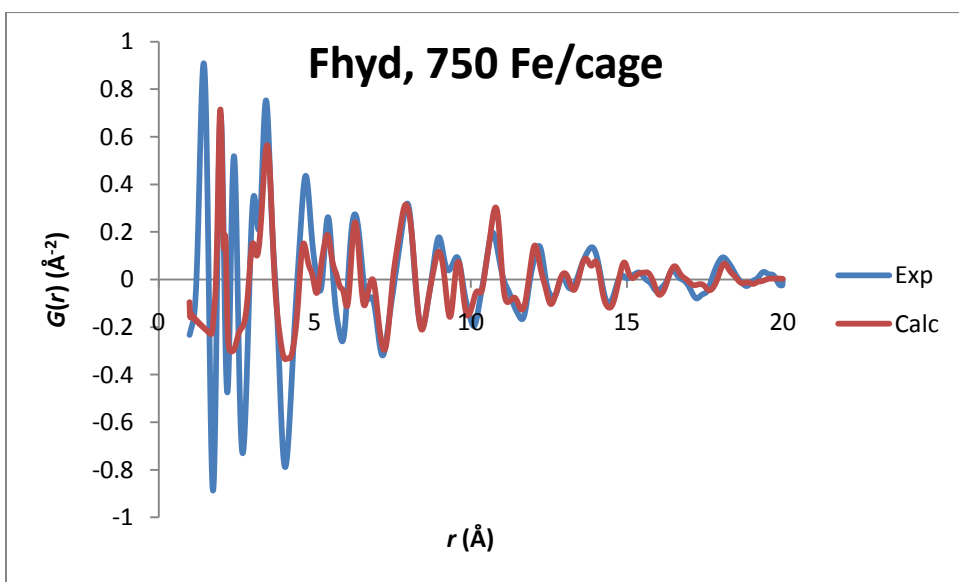

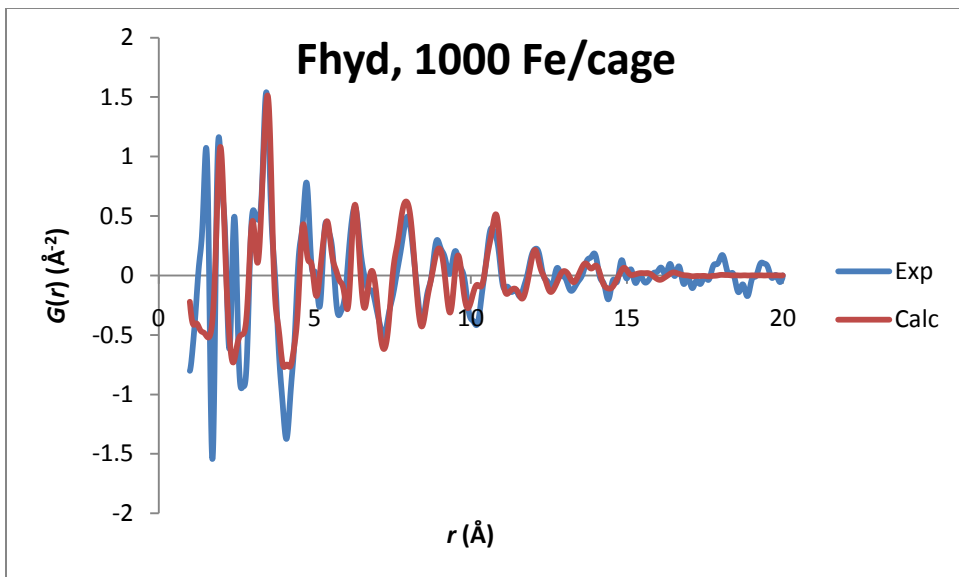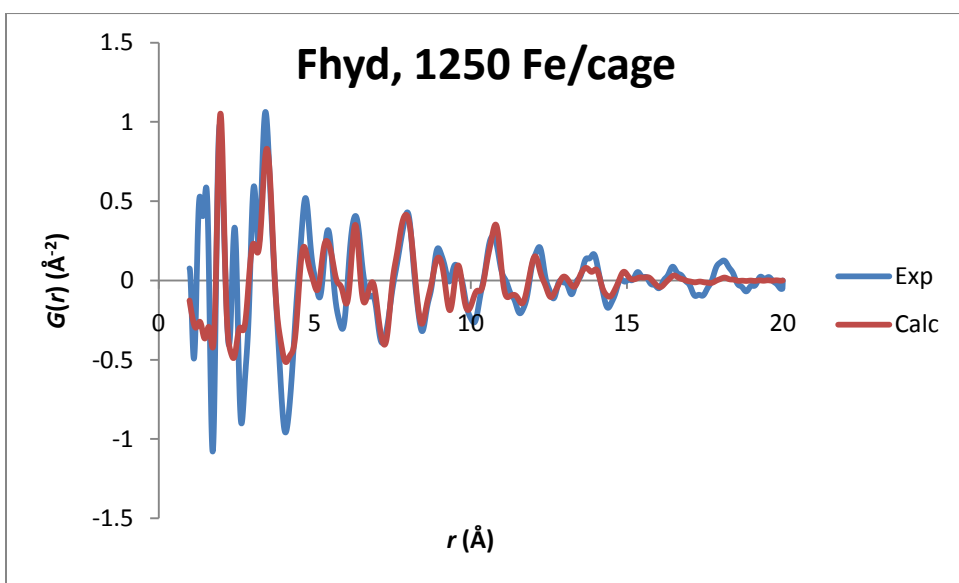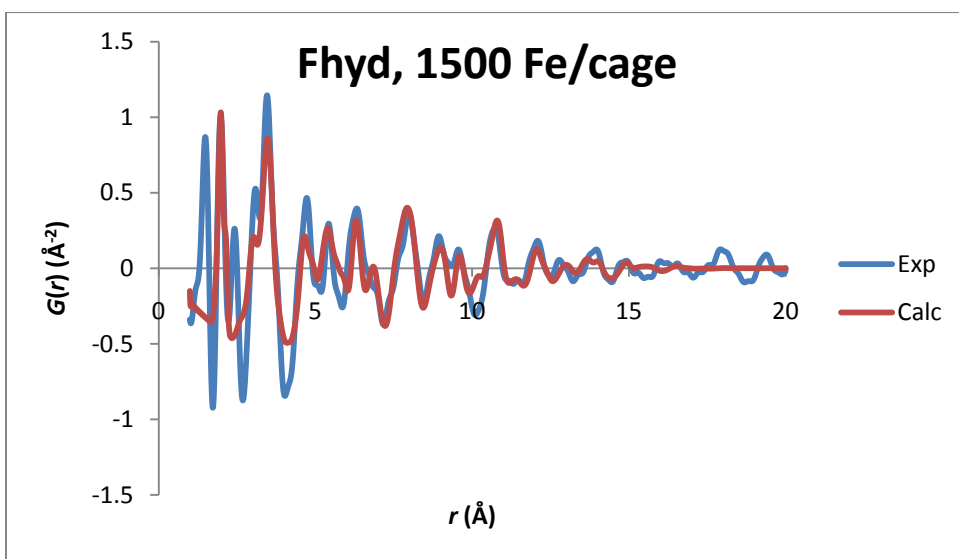

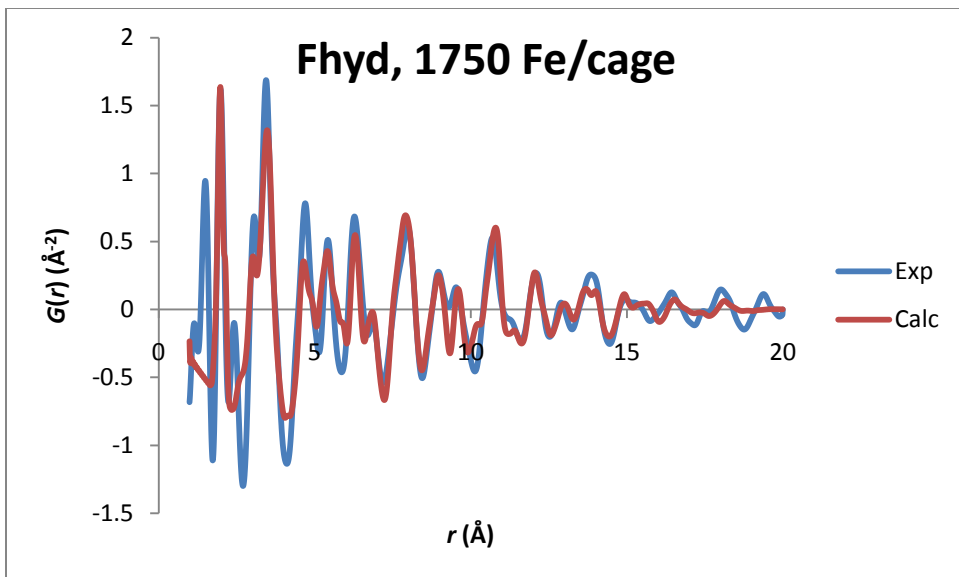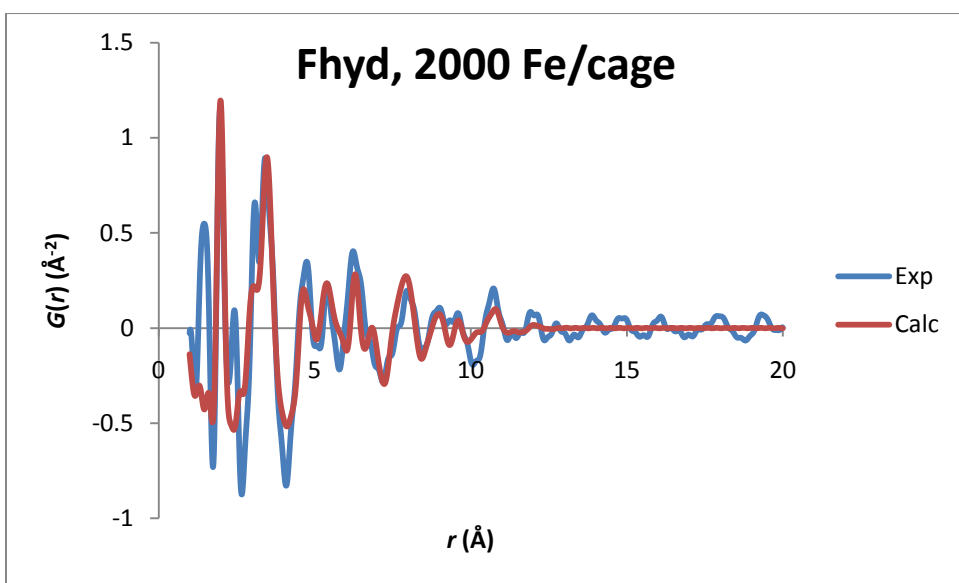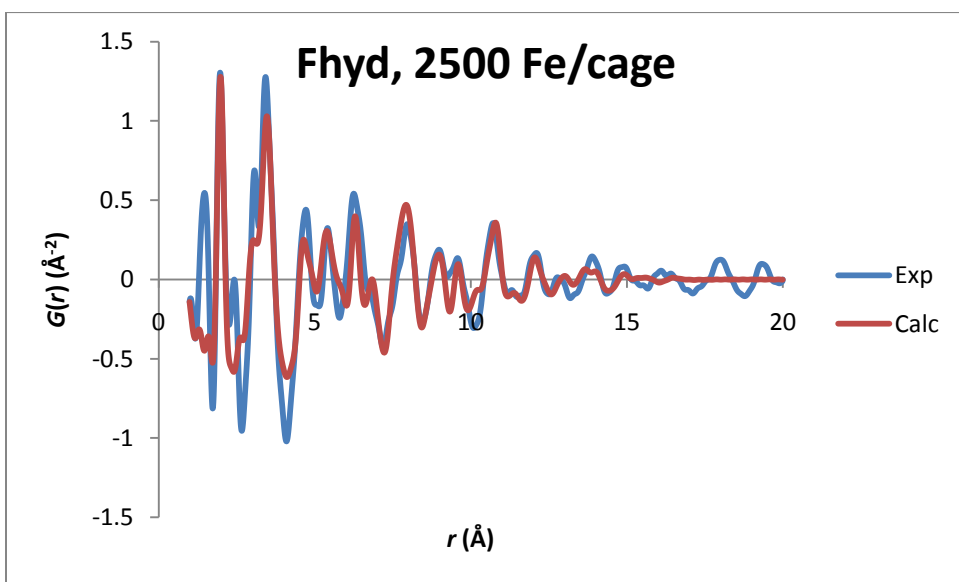

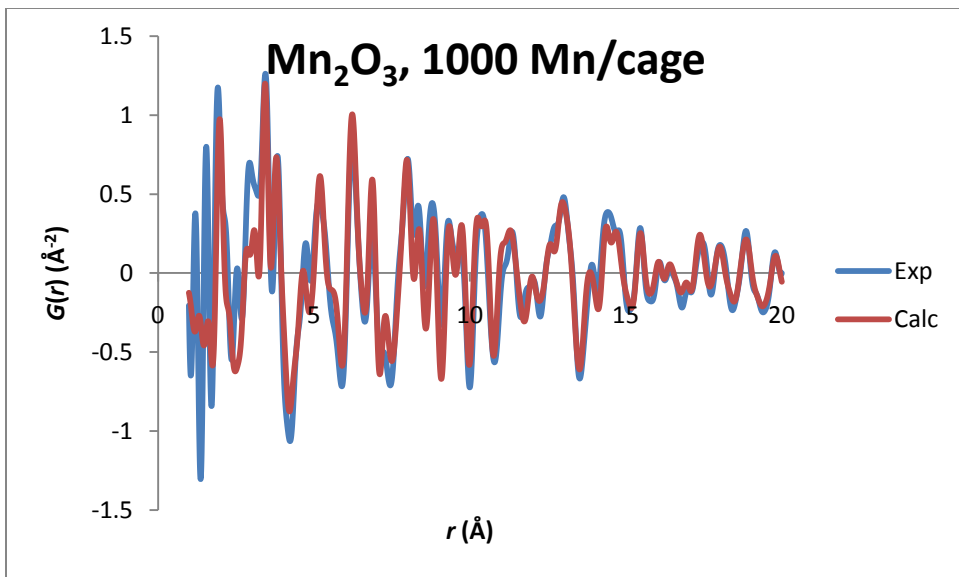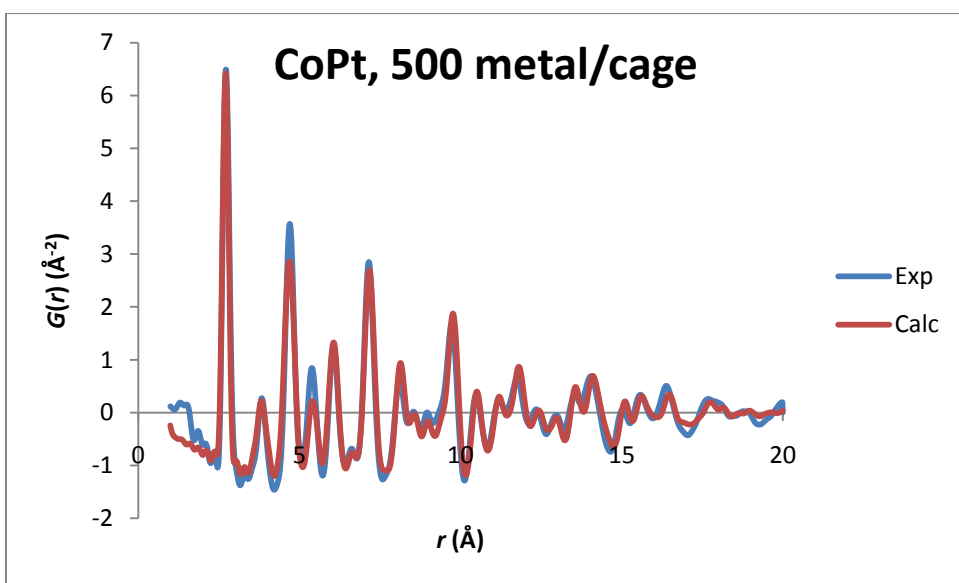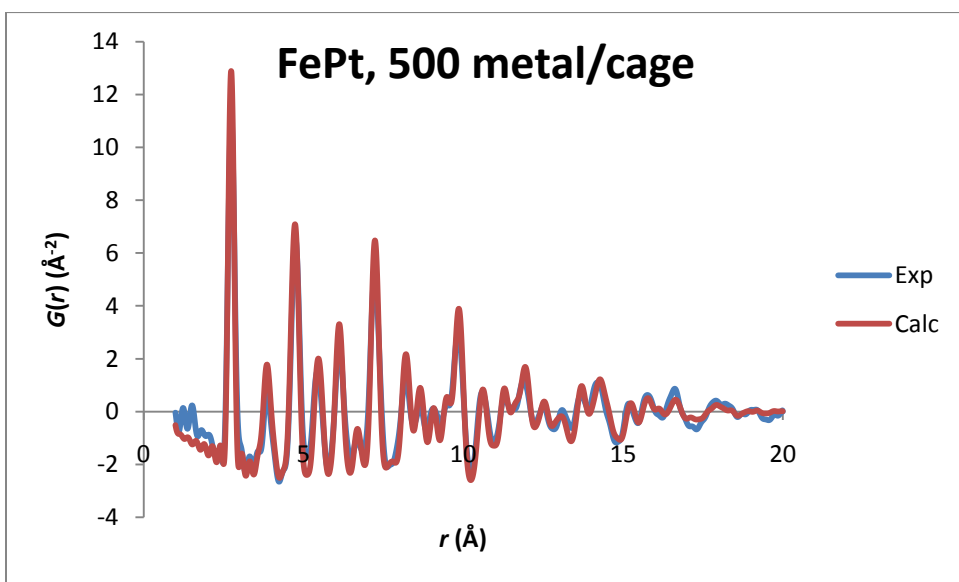

The following PDF was measured using unmineralized lyophilized *P. furiosus* ferritin; the calculated PDF was generated from the protein crystal structure<sup>2</sup> using the *measure gofr* function in VMD<sup>3</sup>.

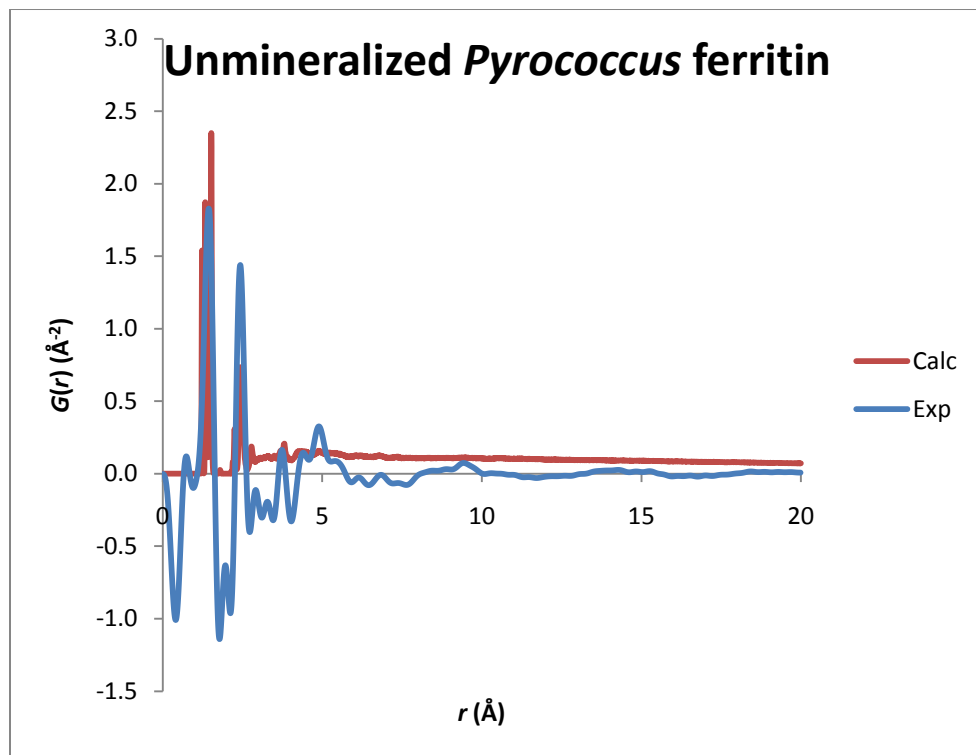

## TEM images

All images below are unstained (unless specified otherwise) and show only the inorganic nanoparticles.

Ferrihydrite in *Pyrococcus* ferritin, 500 Fe/cage –  $4.42 \pm 0.75$  nm (most particles are near the upper right of the image):

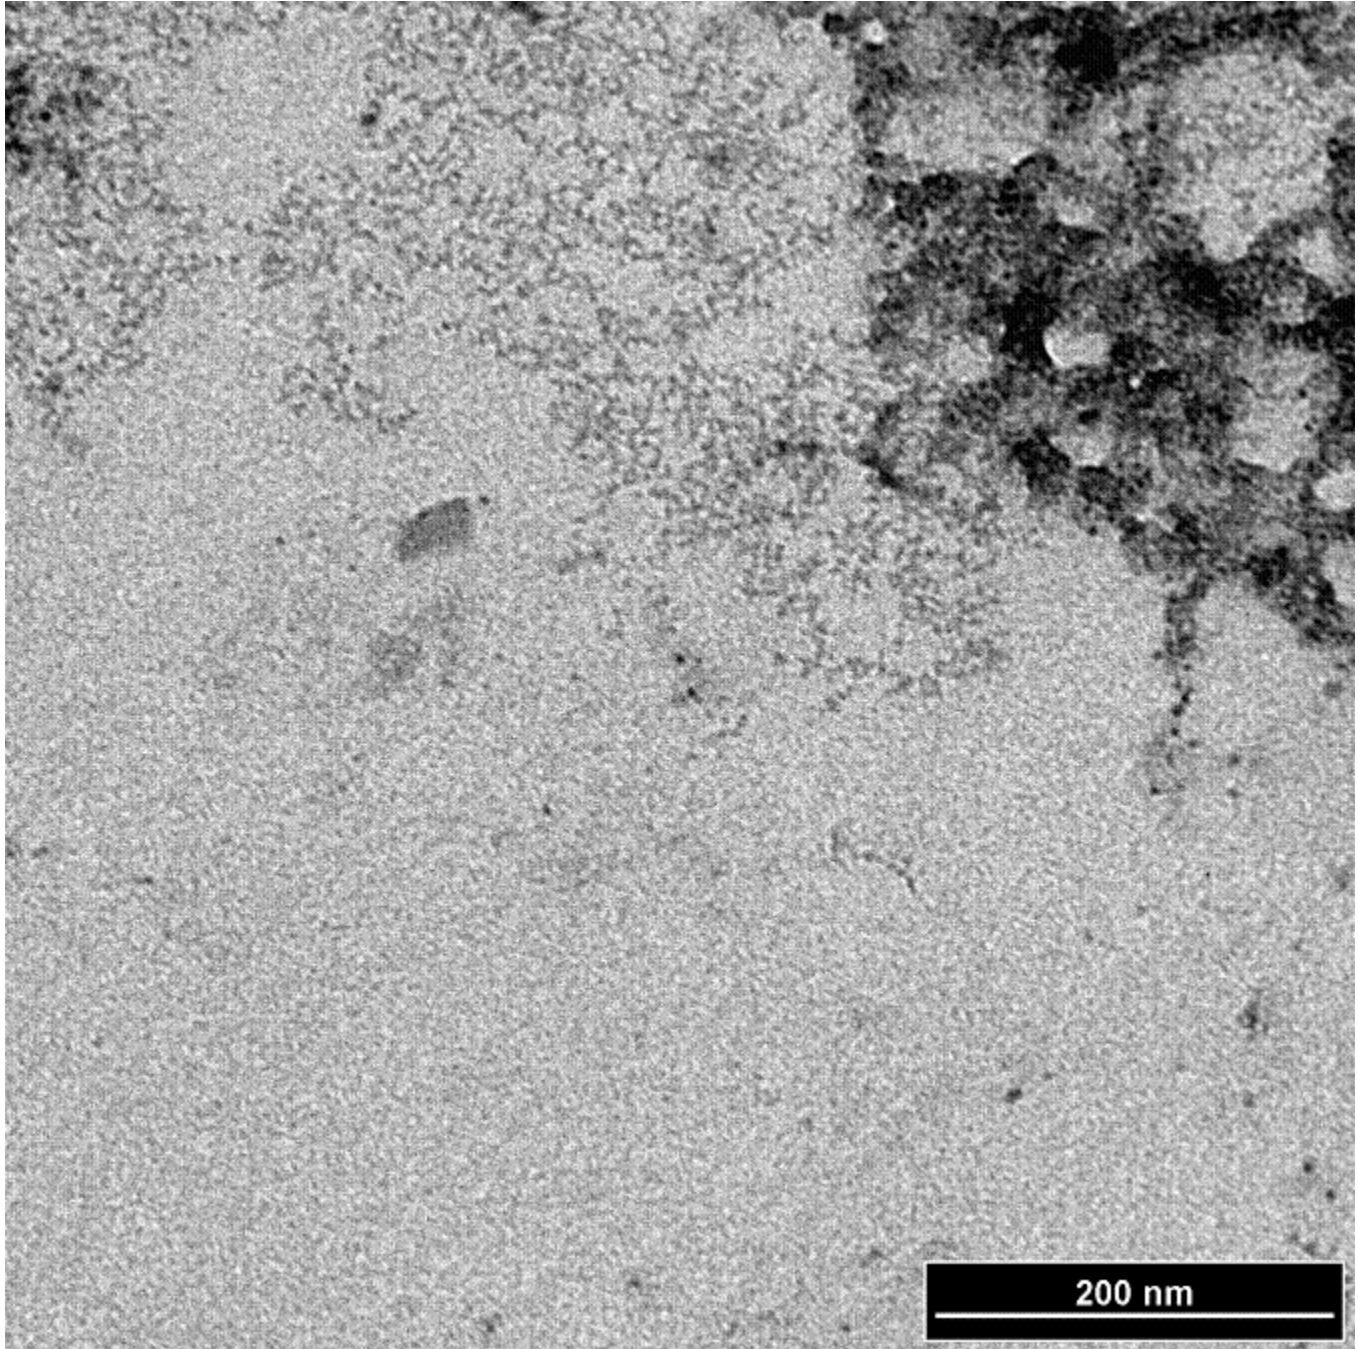



Ferrihydrite in *Pyrococcus* ferritin, 1000 Fe/cage –  $5.15 \pm 1.10$  nm:

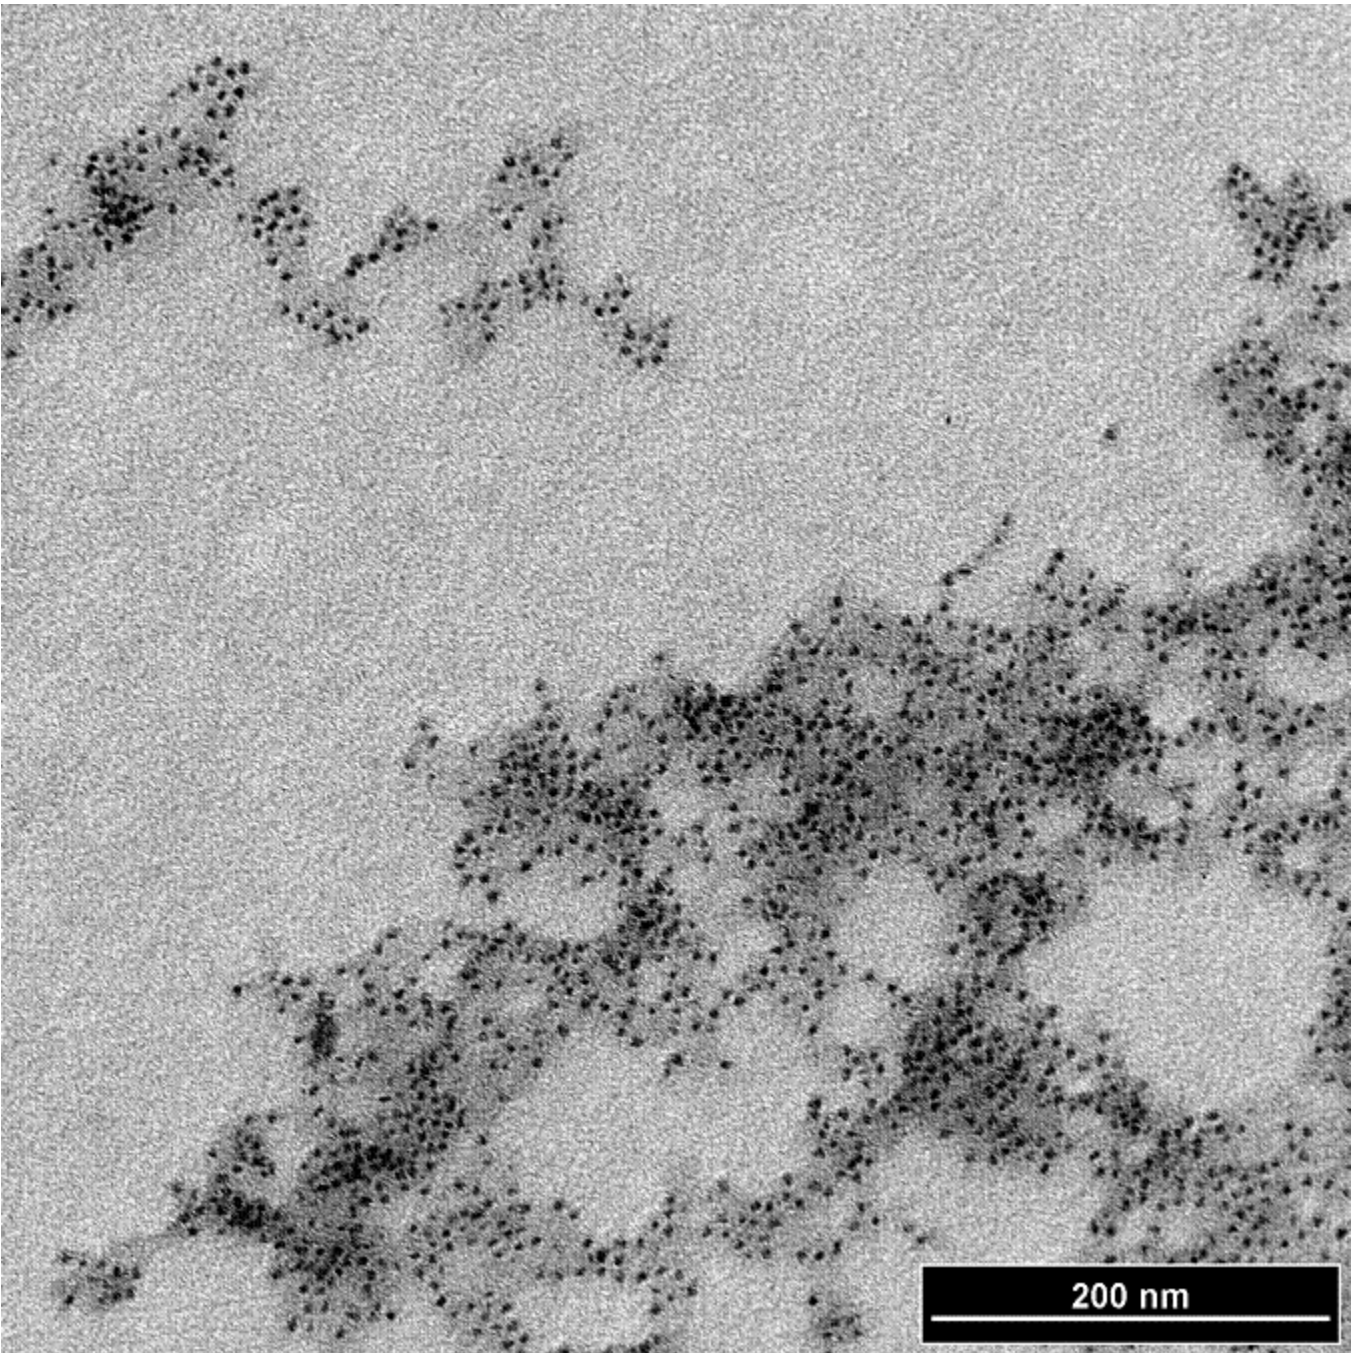

Ferrihydrite in *Pyrococcus* ferritin, 1500 Fe/cage –  $5.19 \pm 0.92$  nm:

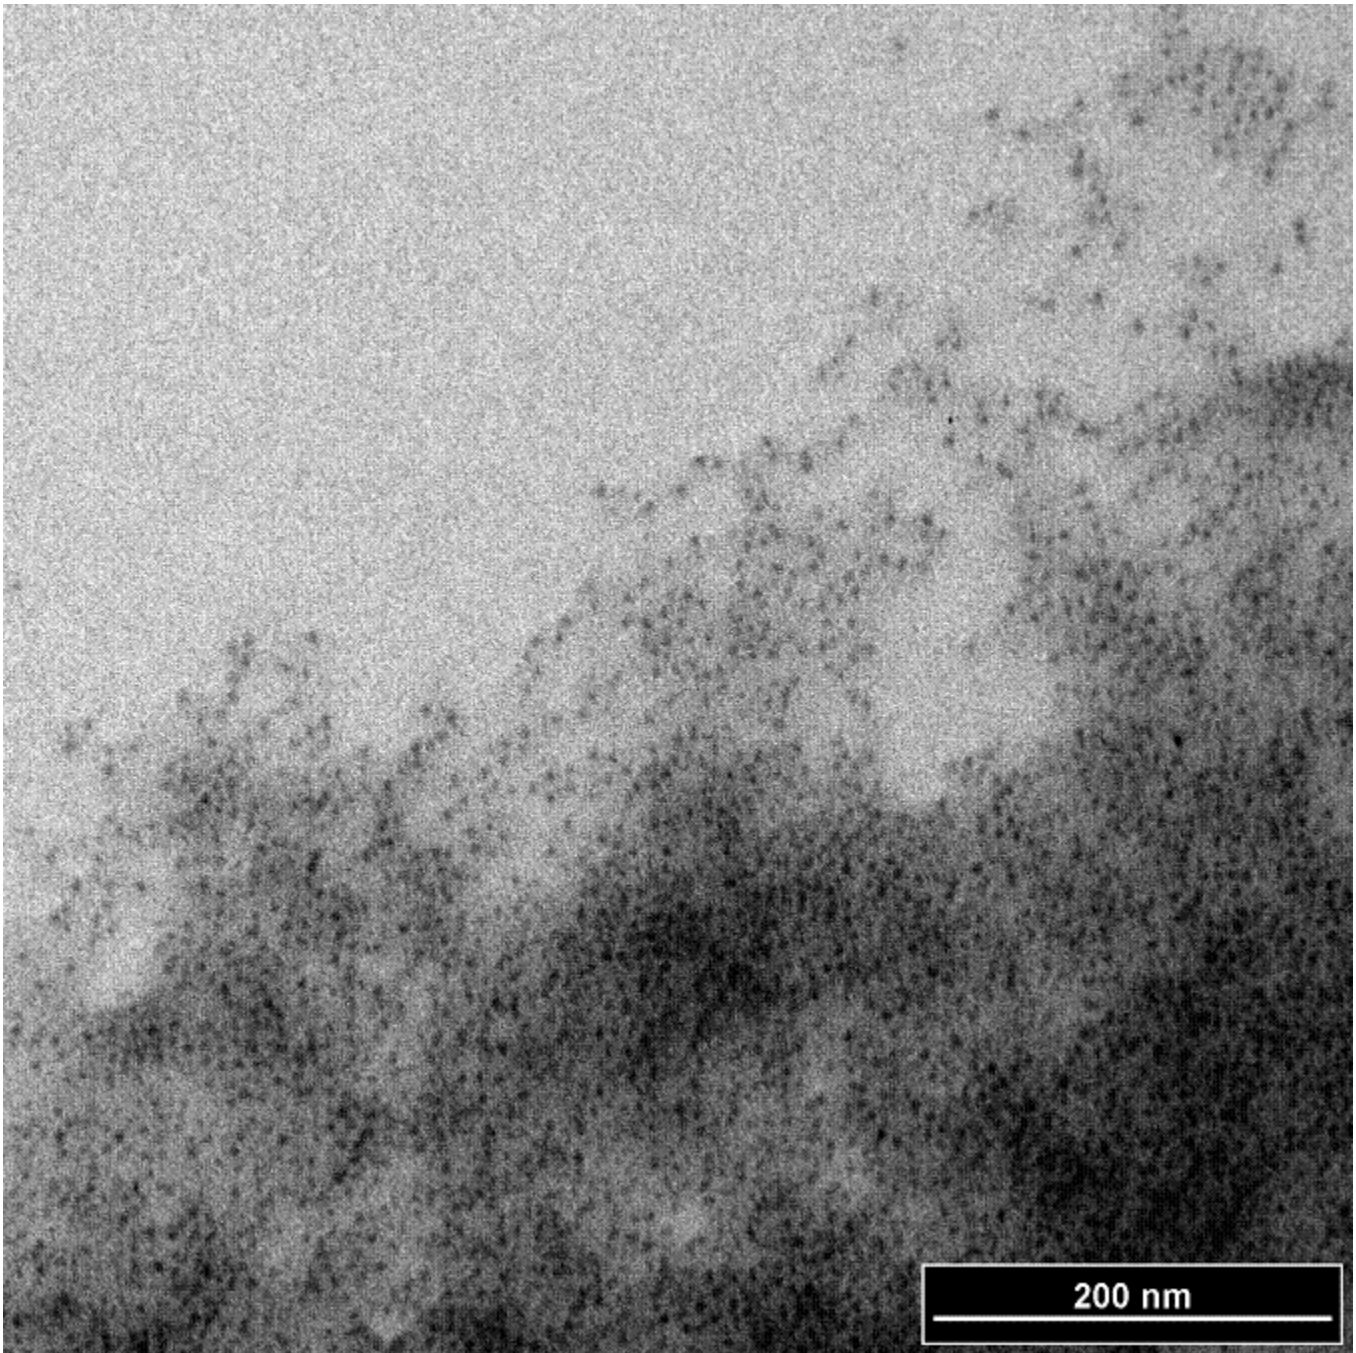

Ferrihydrite in *Pyrococcus* ferritin, 2000 Fe/cage –  $6.86 \pm 1.03$  nm:

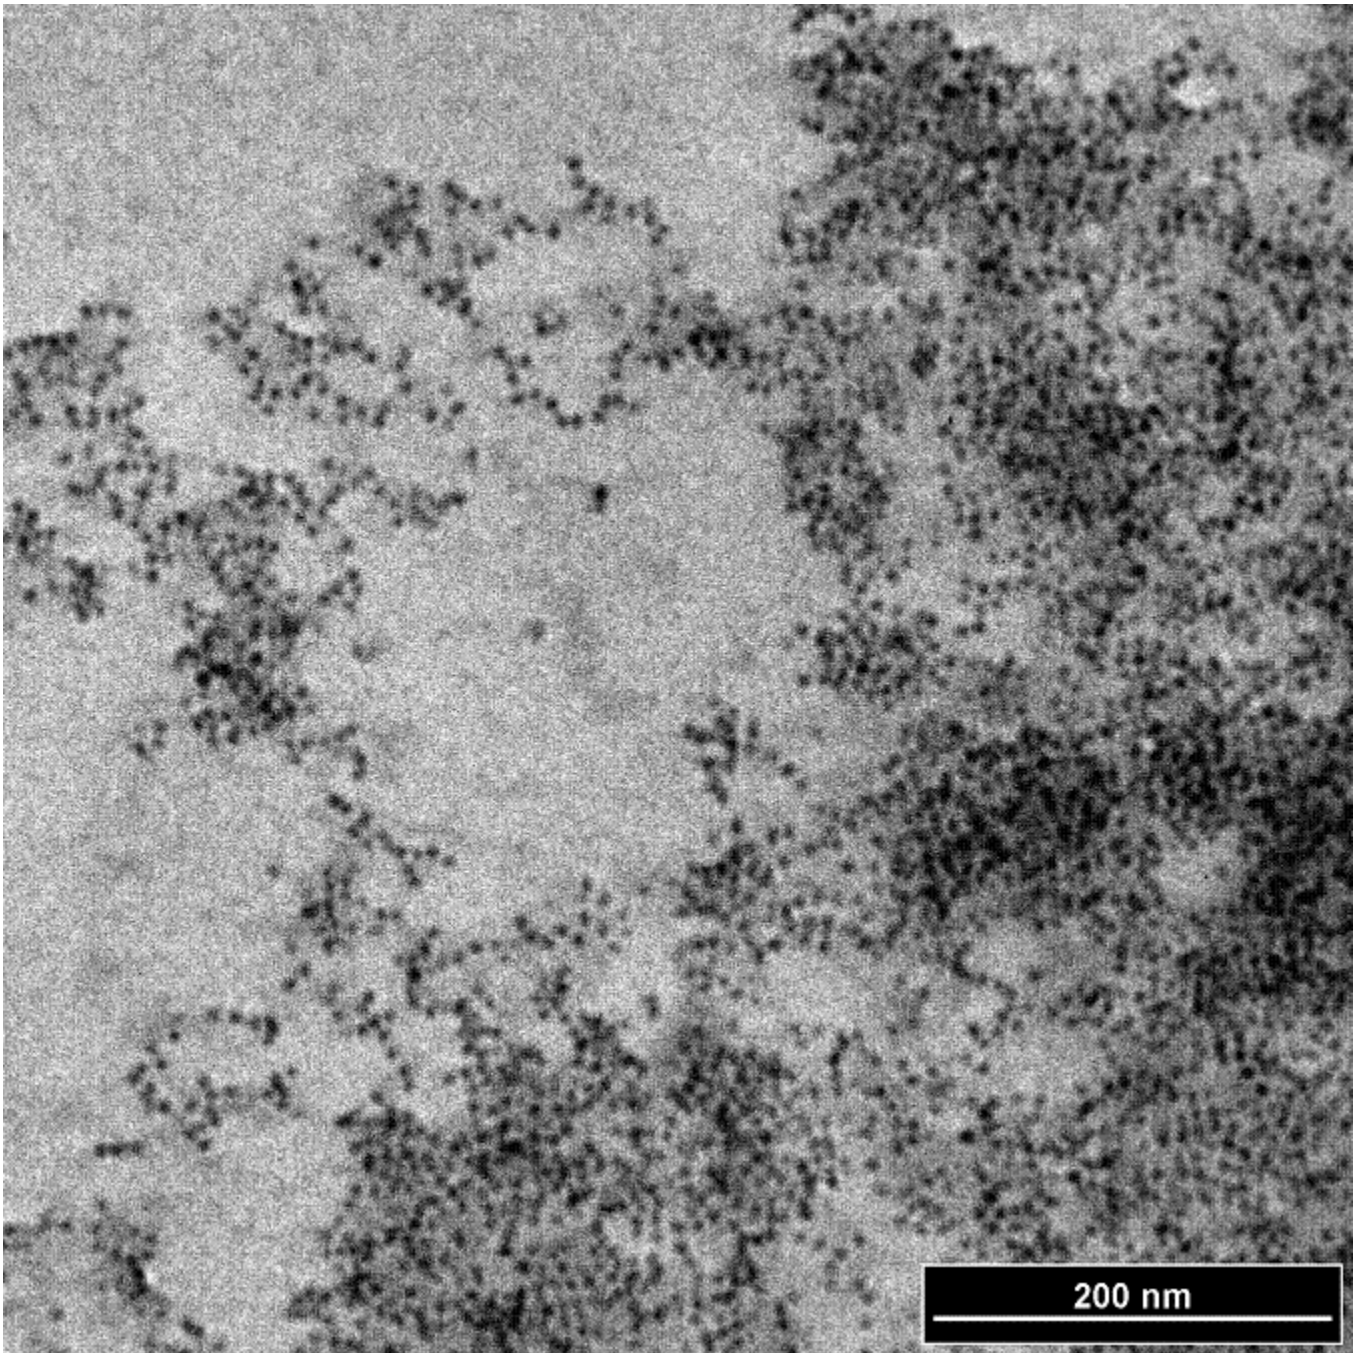



FePt in *Pyrococcus* ferritin –  $6.75 \pm 1.27$  nm:

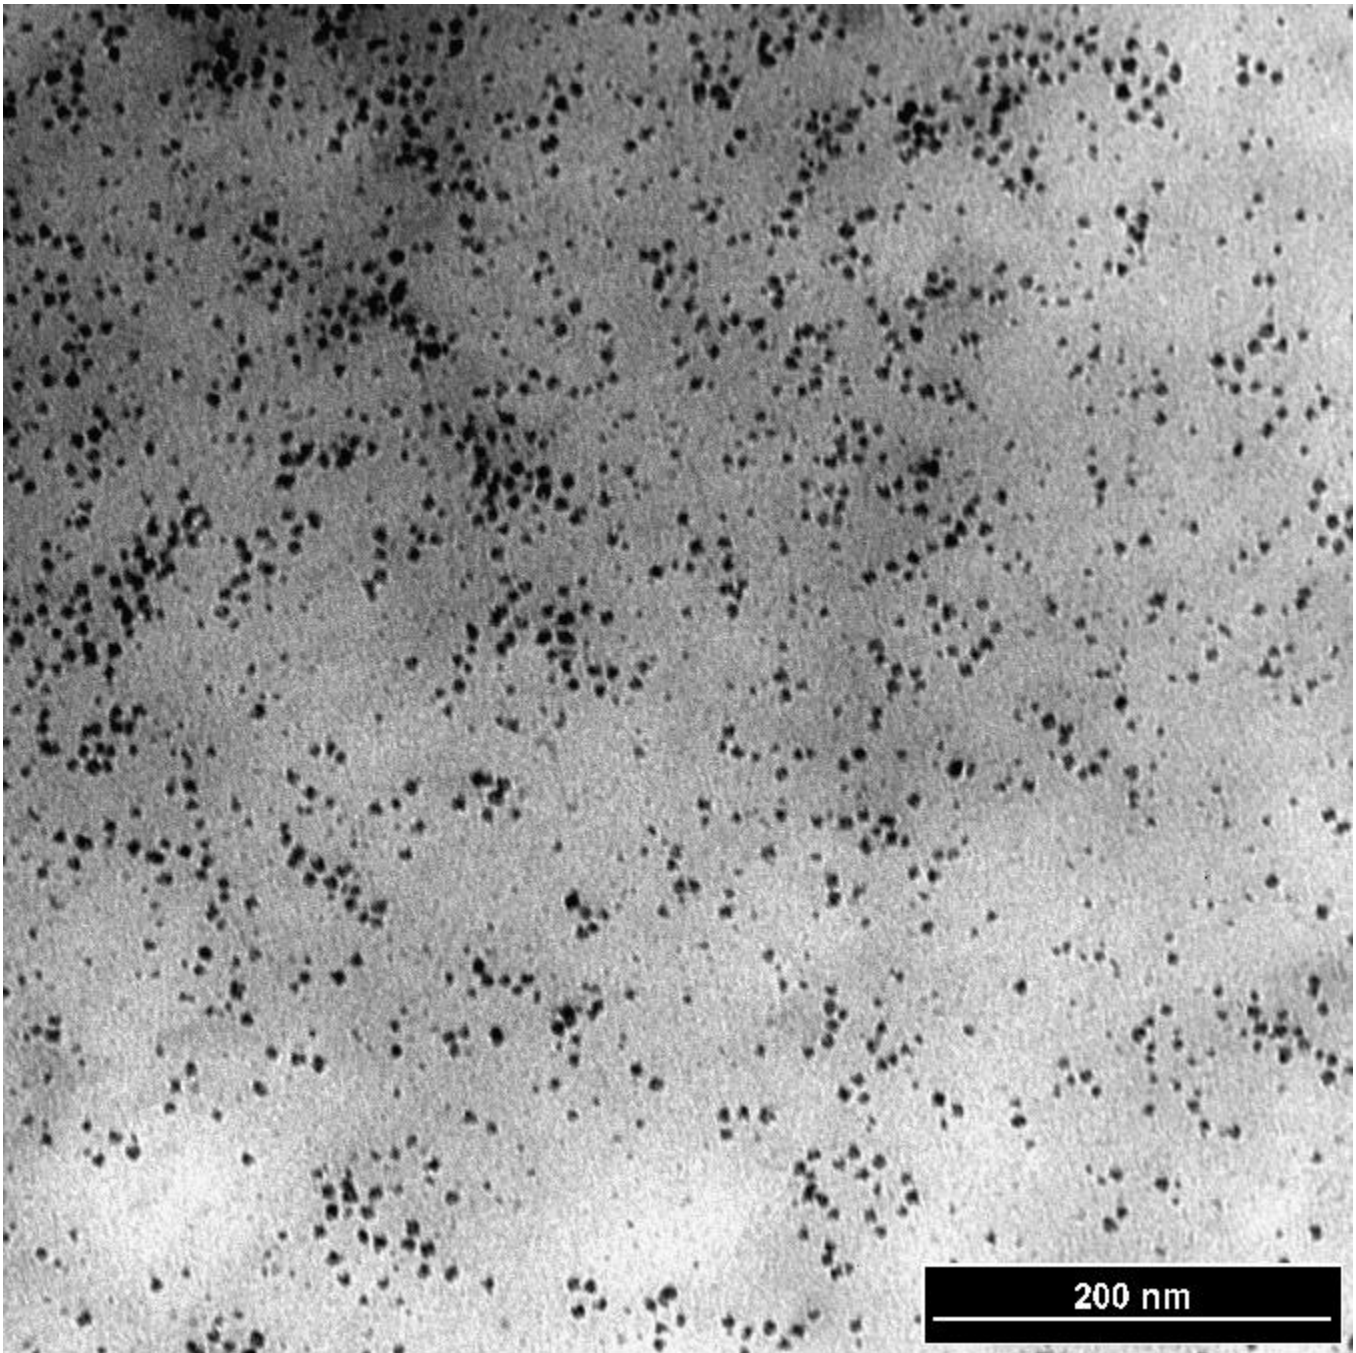

CoPt in *Pyrococcus* ferritin –  $7.14 \pm 0.73$  nm:

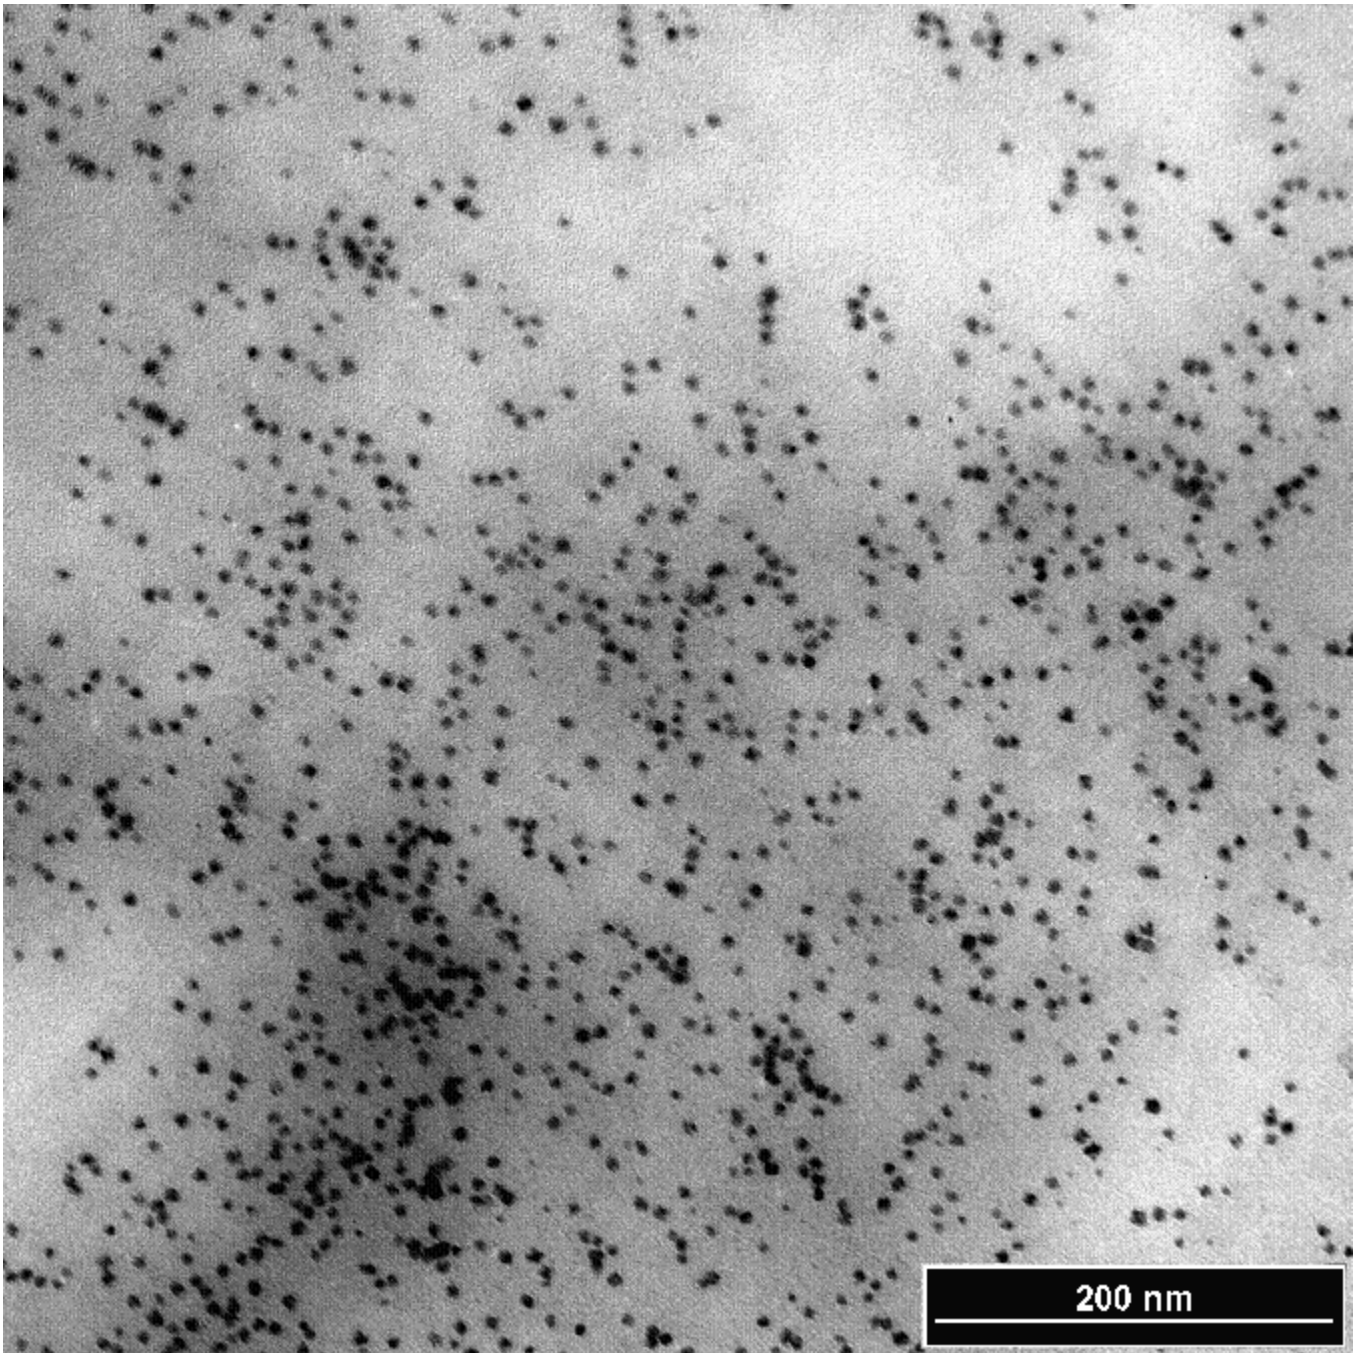

$\gamma\text{-Fe}_2\text{O}_3$  in human ferritin, 1000 Fe/cage –  $3.6 \pm 0.7$  nm:

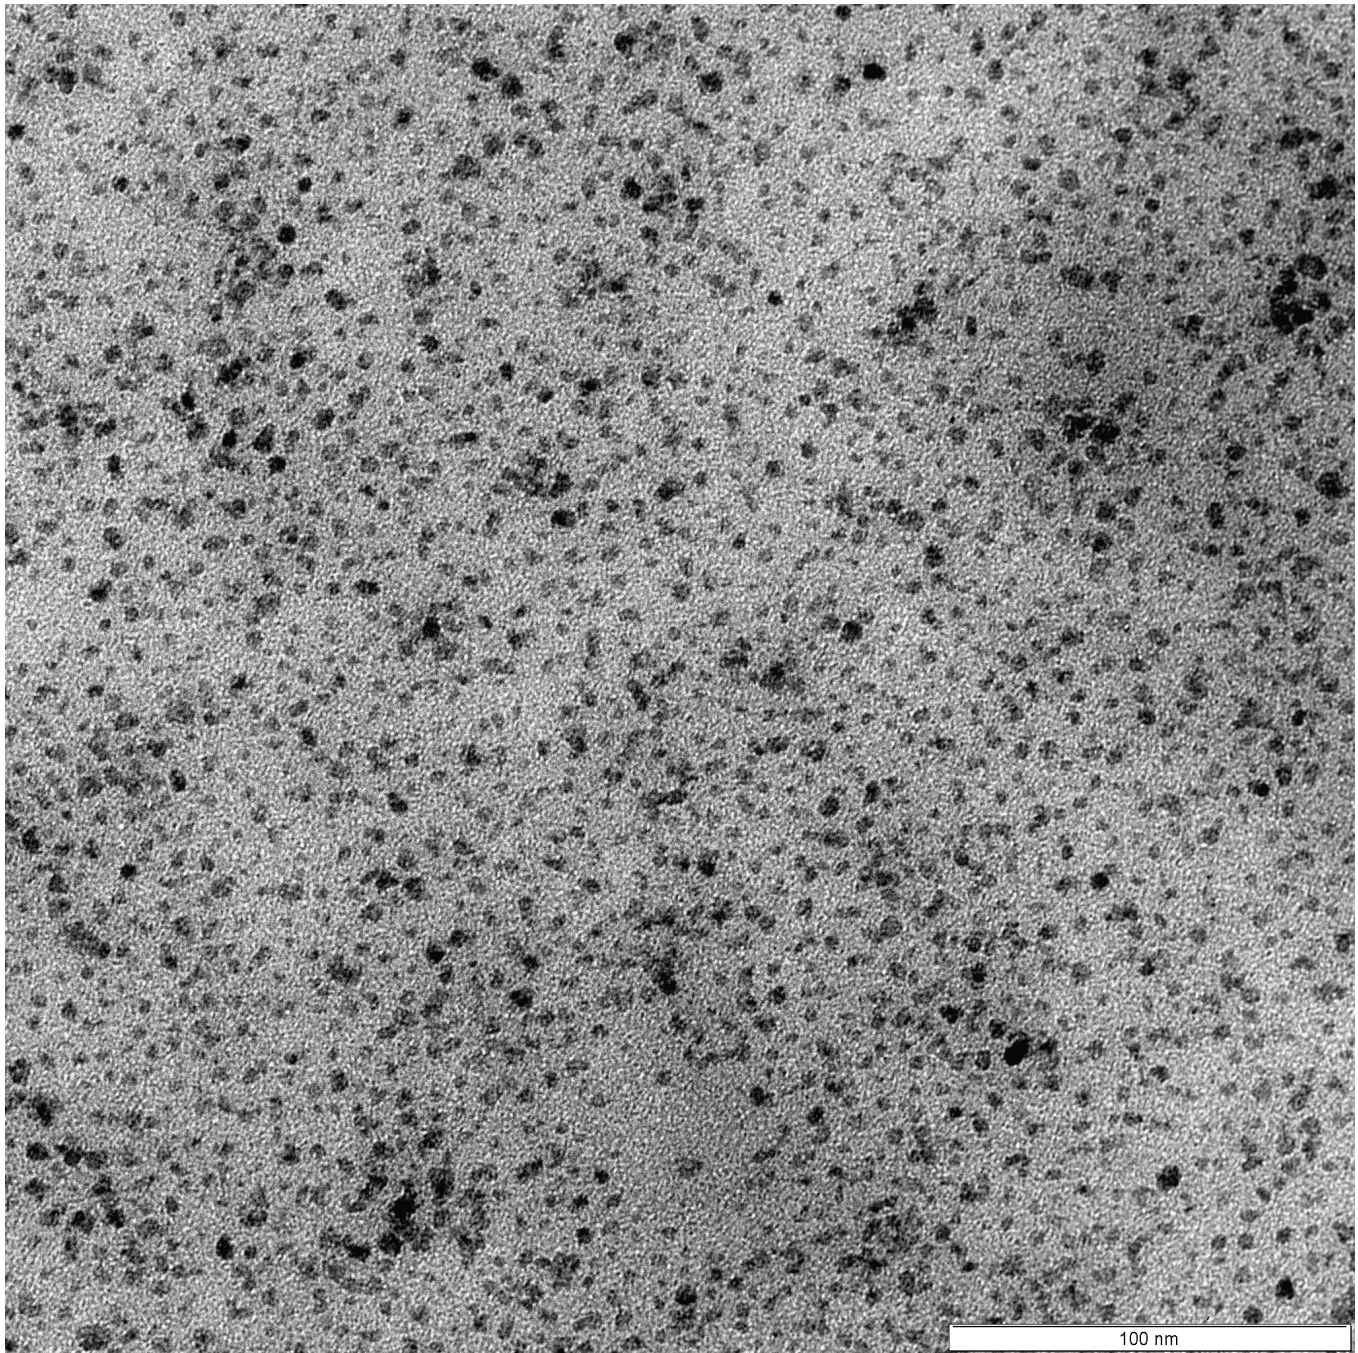



$\gamma$ -Fe<sub>2</sub>O<sub>3</sub> in human ferritin, 3000 Fe/cage –  $5.1 \pm 0.9$  nm:

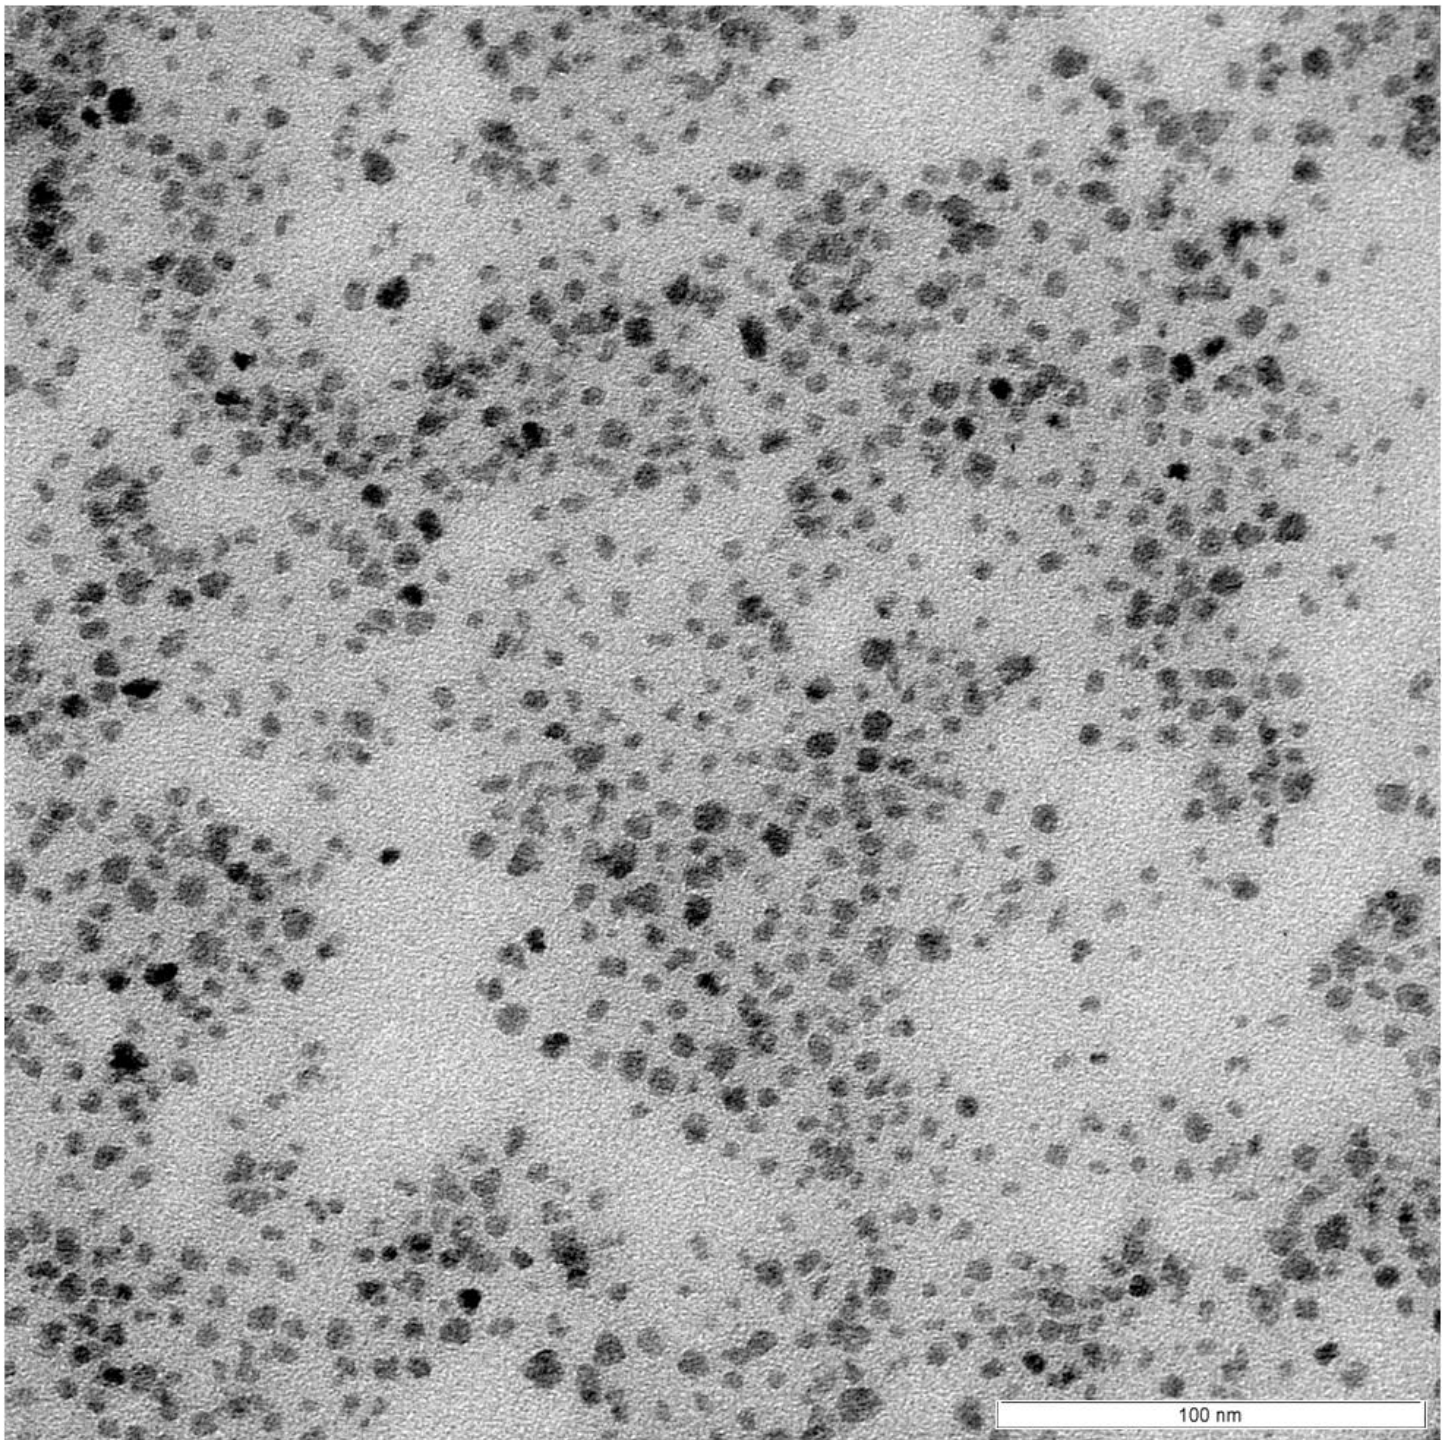

$\gamma\text{-Fe}_2\text{O}_3$  in human ferritin, 5000 Fe/cage –  $5.9 \pm 0.9$  nm:

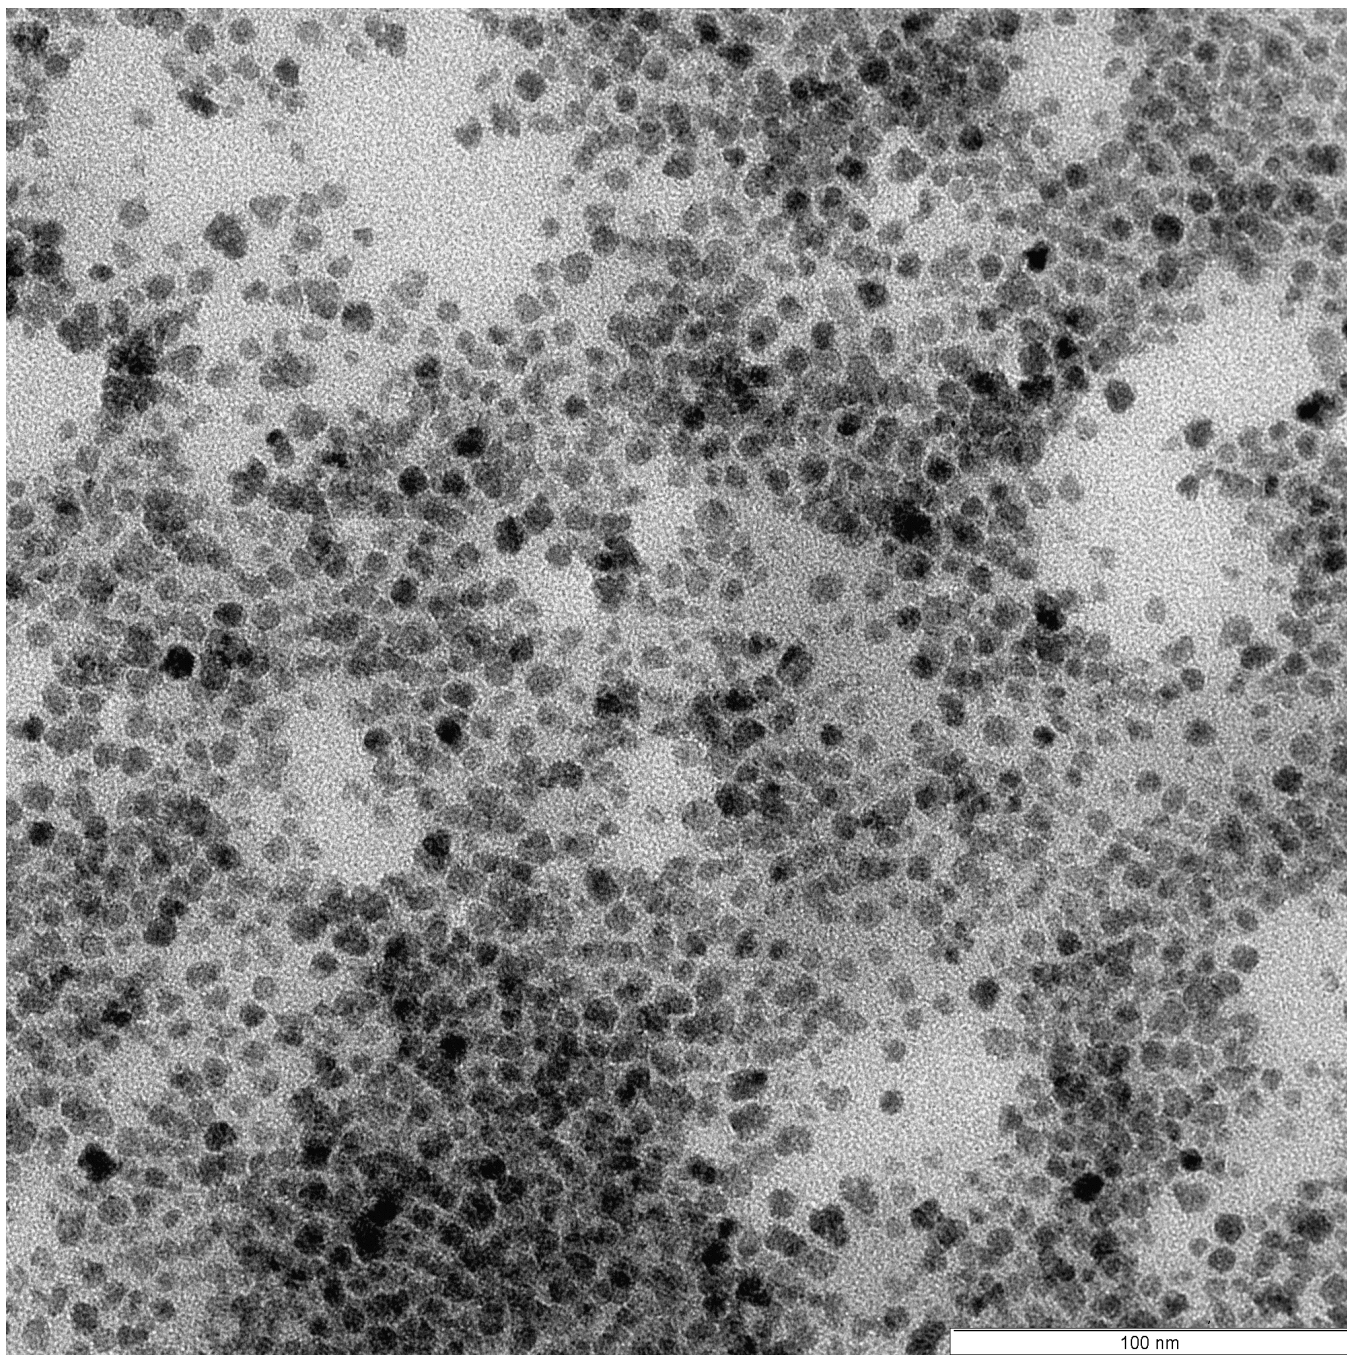



CoPt in *Pyrococcus* ferritin, stained with uranyl acetate to show protein –  $12.67 \pm 0.90$  nm.

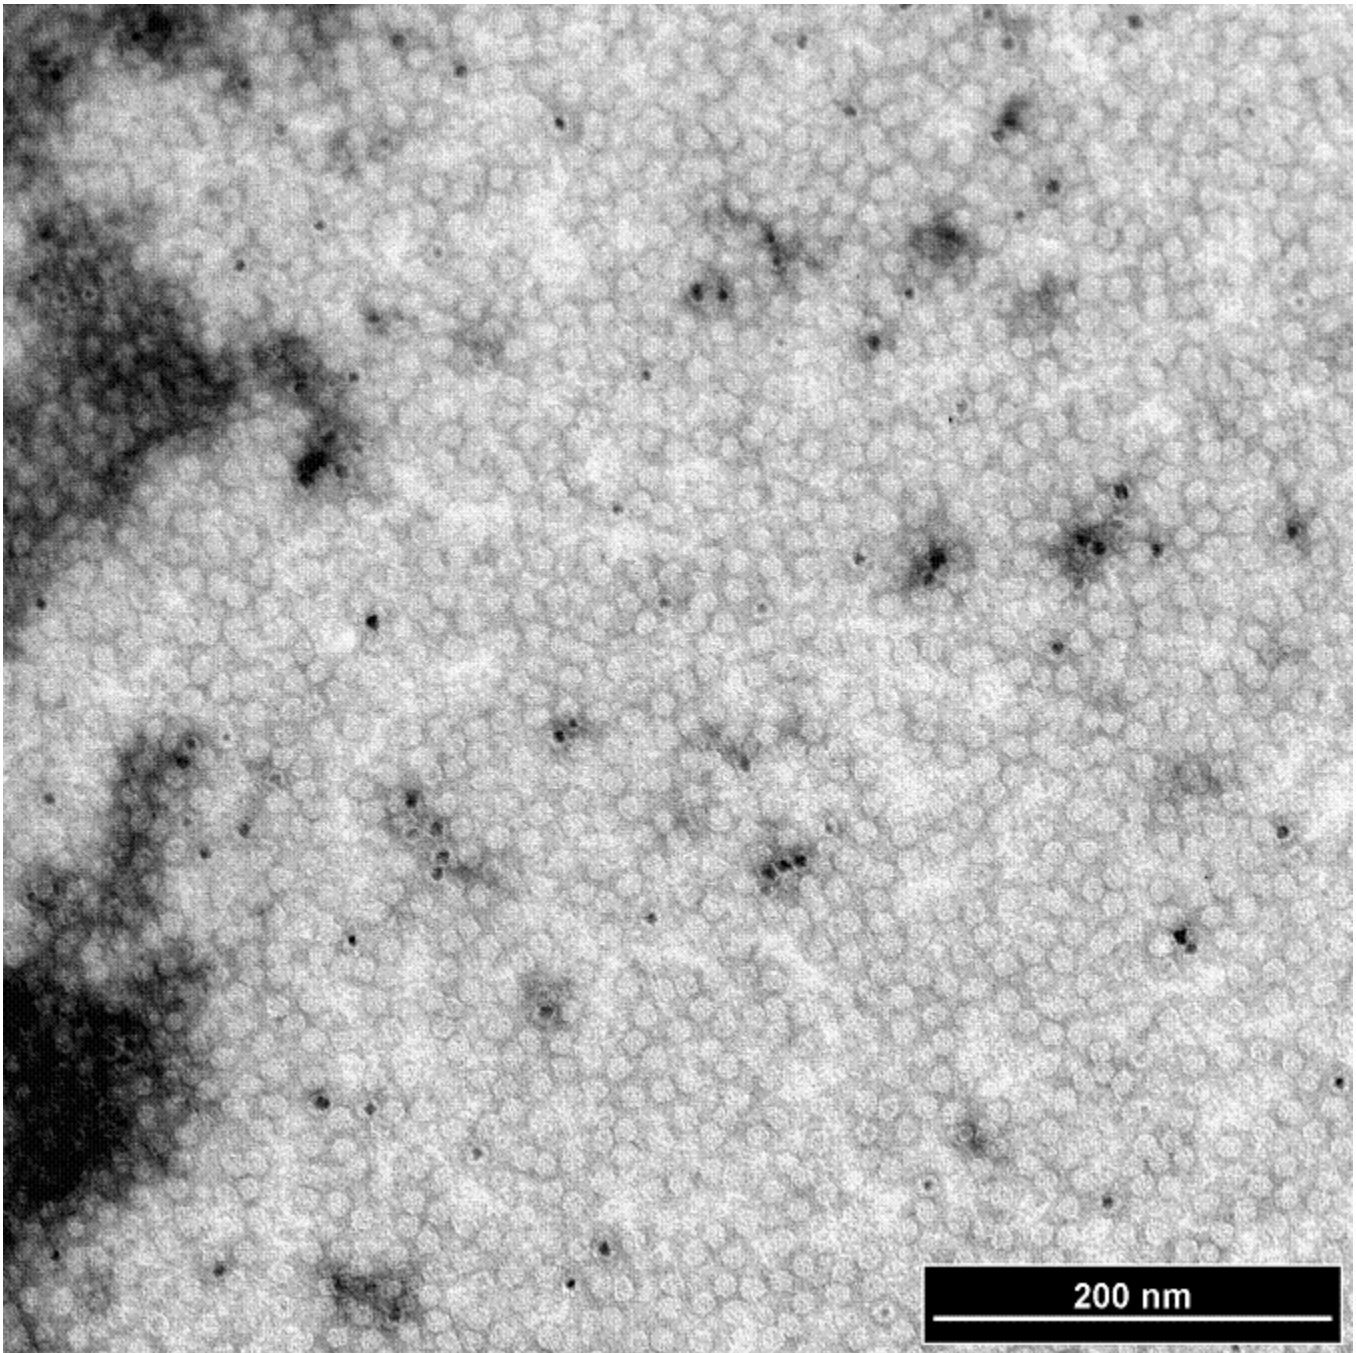

## References

1. Farrow, C. L.; Juhas, P.; Liu, J. W.; Bryndin, D.; Bozin, E. S.; Bloch, J.; Proffen, T.; Billinge, S. J. L., PDFfit2 and PDFgui: computer programs for studying nanostructure in crystals. *Journal of Physics-Condensed Matter* **2007**, *19*, (33), -.
2. Tatur, J.; Hagen, W. R.; Matias, P. M., Crystal structure of the ferritin from the hyperthermophilic archaeal anaerobe *Pyrococcus furiosus*. *J Biol Inorg Chem* **2007**, *12*, (5), 615-30.
3. Humphrey, W.; Dalke, A.; Schulten, K., VMD: visual molecular dynamics. *J Mol Graph* **1996**, *14*, (1), 33-8, 27-8.
